# Supplementary material for: Three New Cembranoids from the Taiwanese Soft Coral Sarcophyton ehrenbergi
Source: PubMed Central journal article supplement (PMC3407922; doi:10.3390/md10071433), 2012-06-27

## Supplementary Information

### Table of Contents

|                                                                                                                                    |   |
|------------------------------------------------------------------------------------------------------------------------------------|---|
| <b>Figure S1.</b> $^1\text{H}$ NMR spectrum (400 MHz) of (+)-12-ethoxycarbonyl-11Z-sarcophine ( <b>1</b> ) in $\text{CDCl}_3$ .    | 2 |
| <b>Figure S2.</b> $^{13}\text{C}$ NMR spectrum (100 MHz) of (+)-12-ethoxycarbonyl-11Z-sarcophine ( <b>1</b> ) in $\text{CDCl}_3$ . | 3 |
| <b>Figure S3.</b> $^1\text{H}$ NMR spectrum (400 MHz) of ehrenbergol A ( <b>2</b> ) in $\text{C}_6\text{D}_6$ .                    | 4 |
| <b>Figure S4.</b> $^{13}\text{C}$ NMR spectrum (100 MHz) of ehrenbergol A ( <b>2</b> ) in $\text{C}_6\text{D}_6$ .                 | 5 |
| <b>Figure S5.</b> $^1\text{H}$ NMR spectrum (400 MHz) of ehrenbergol B ( <b>3</b> ) in $\text{C}_6\text{D}_6$ .                    | 6 |
| <b>Figure S6.</b> $^{13}\text{C}$ NMR spectrum (100 MHz) of ehrenbergol B ( <b>3</b> ) in $\text{C}_6\text{D}_6$ .                 | 7 |

**Figure S1.**  $^1\text{H}$  NMR spectrum (400 MHz) of (+)-12-ethoxycarbonyl-11Z-sarcophine (**1**) in  $\text{CDCl}_3$ .

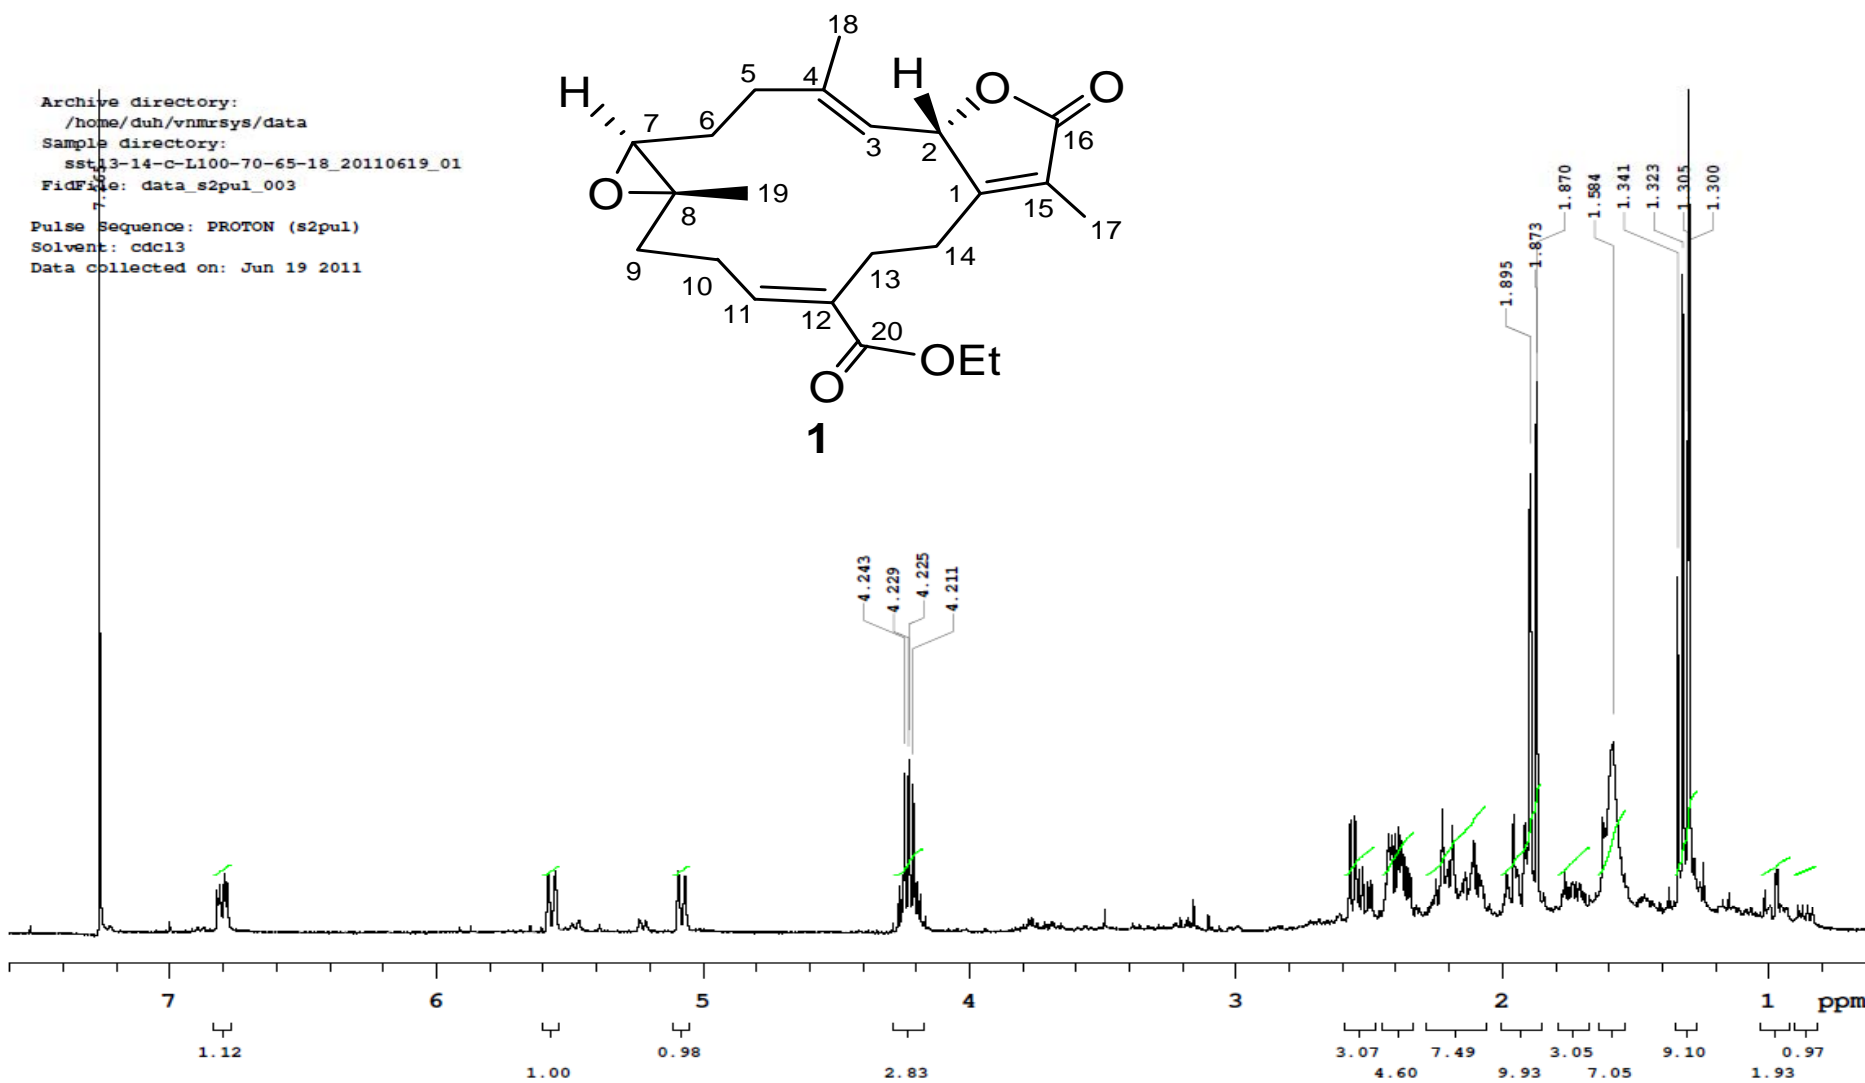

**Figure S2.**  $^{13}\text{C}$  NMR spectrum (100 MHz) of (+)-12-ethoxycarbonyl-11Z-sarcophine (**1**) in  $\text{CDCl}_3$ .

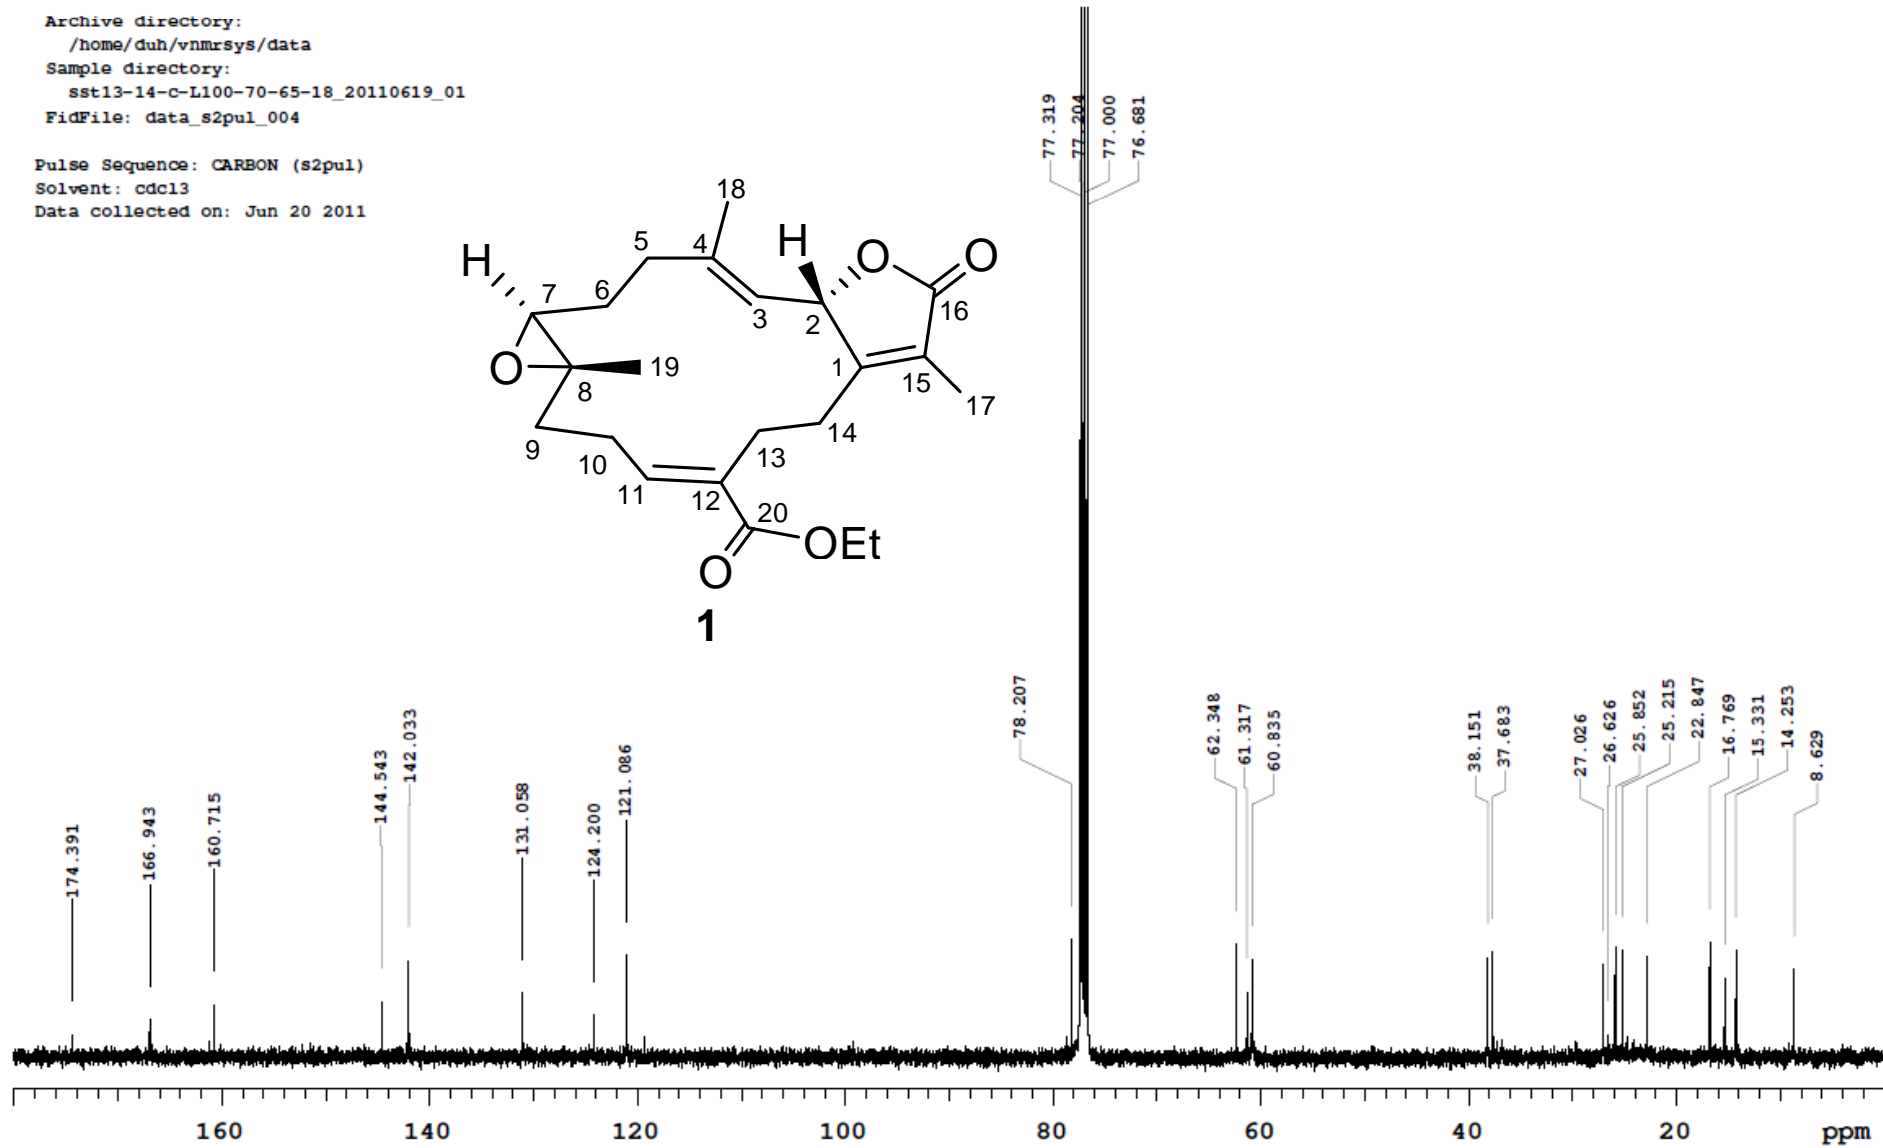

Figure S3.  $^1\text{H}$  NMR spectrum (400 MHz) of ehrenbergol A (**2**) in  $\text{C}_6\text{D}_6$ .

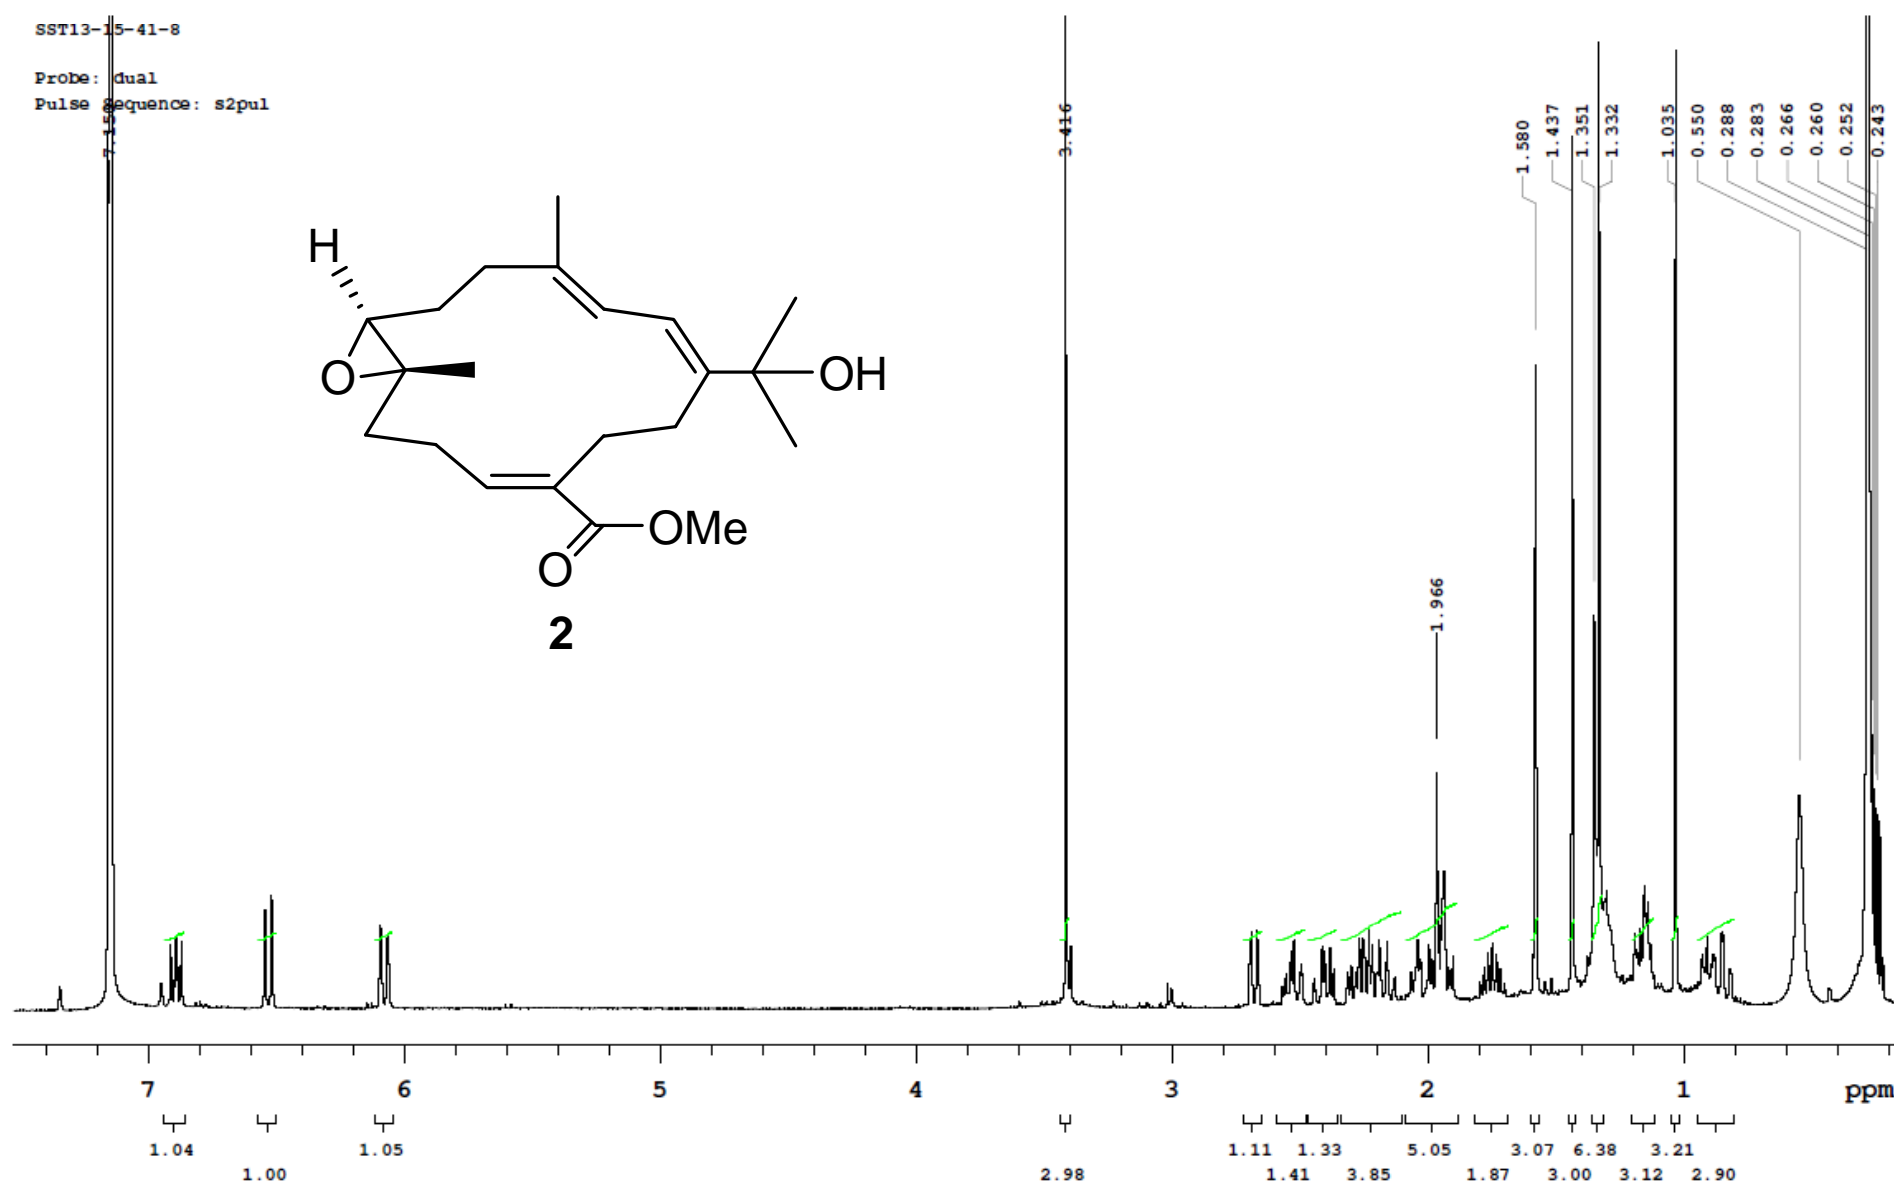

**Figure S4.**  $^{13}\text{C}$  NMR spectrum (100 MHz) of ehrenbergol A (**2**) in  $\text{C}_6\text{D}_6$ .

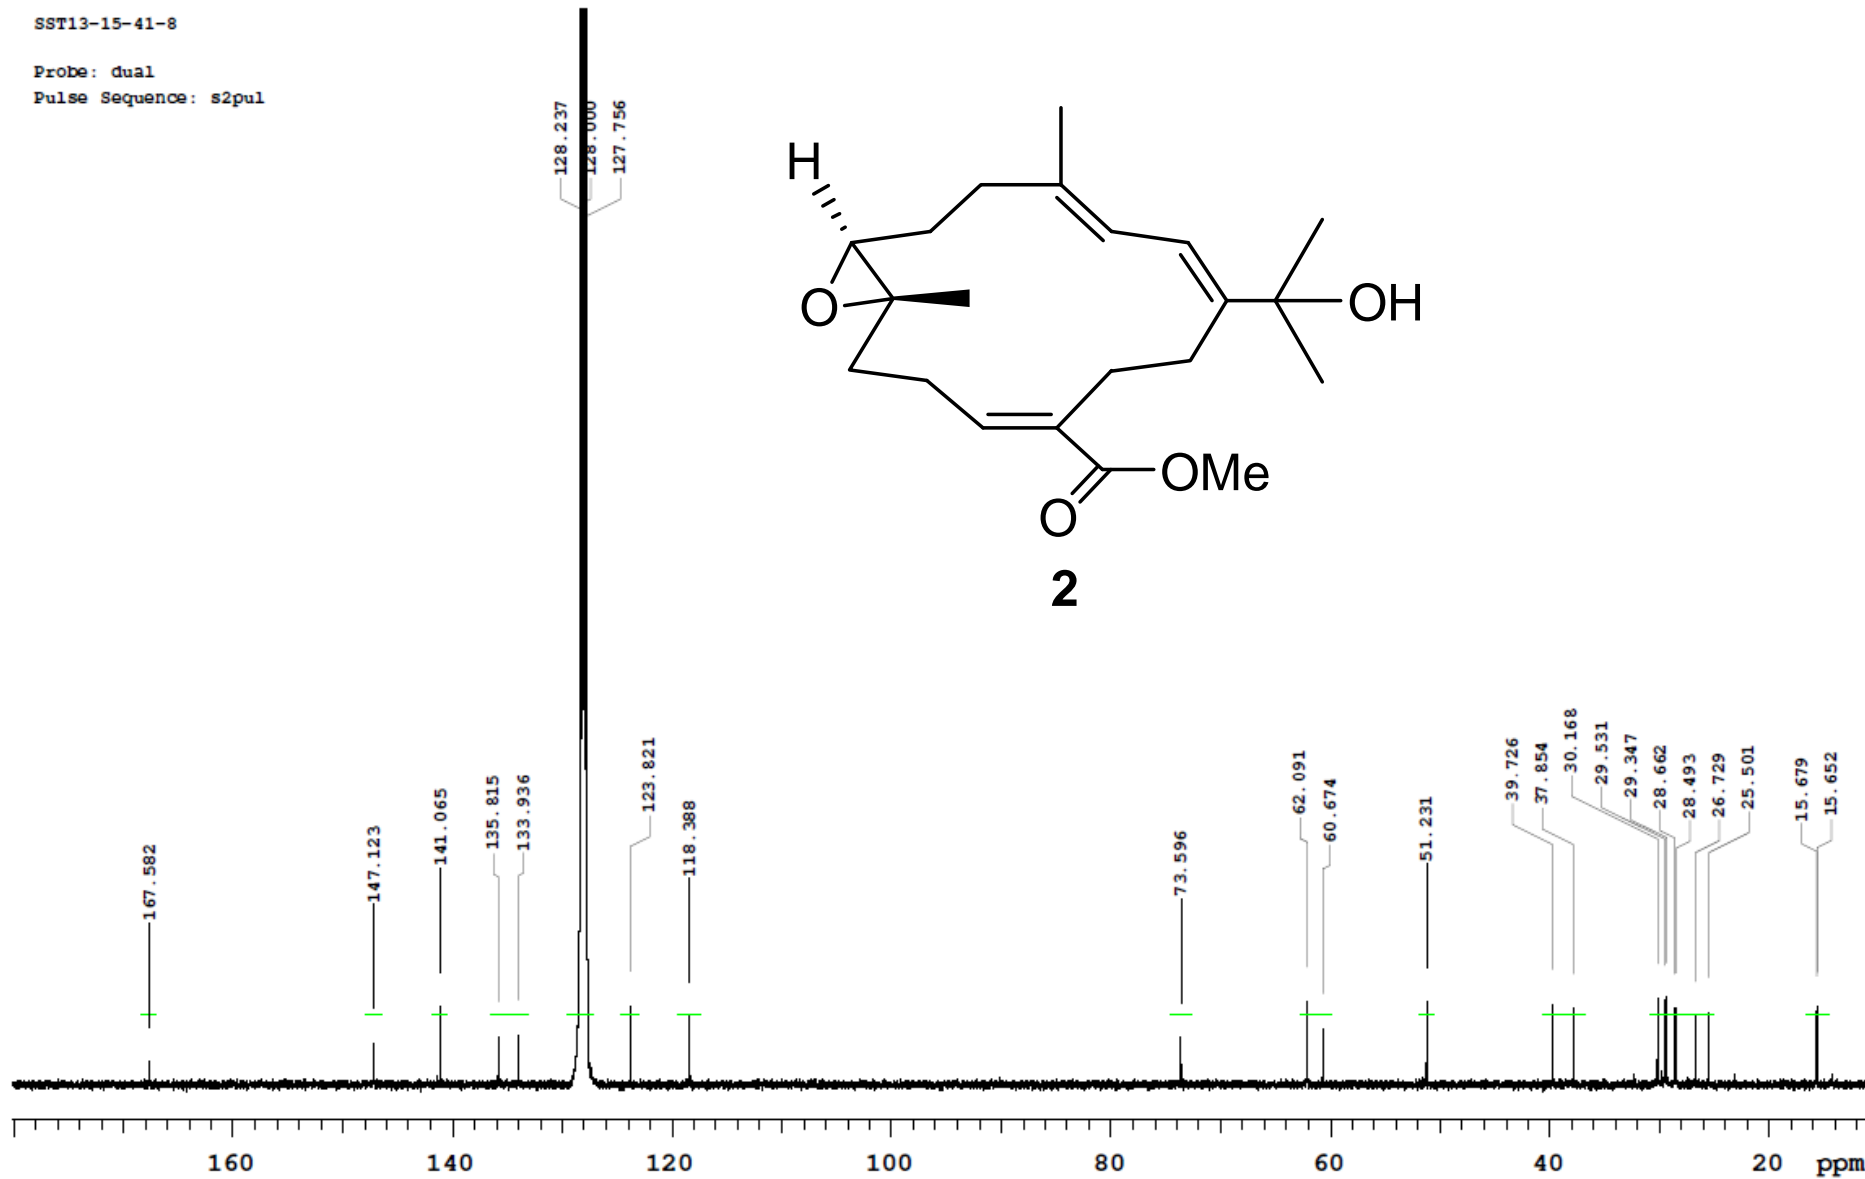

Figure S5. <sup>1</sup>H NMR spectrum (400 MHz) ehrenbergol B (3) in C<sub>6</sub>D<sub>6</sub>.

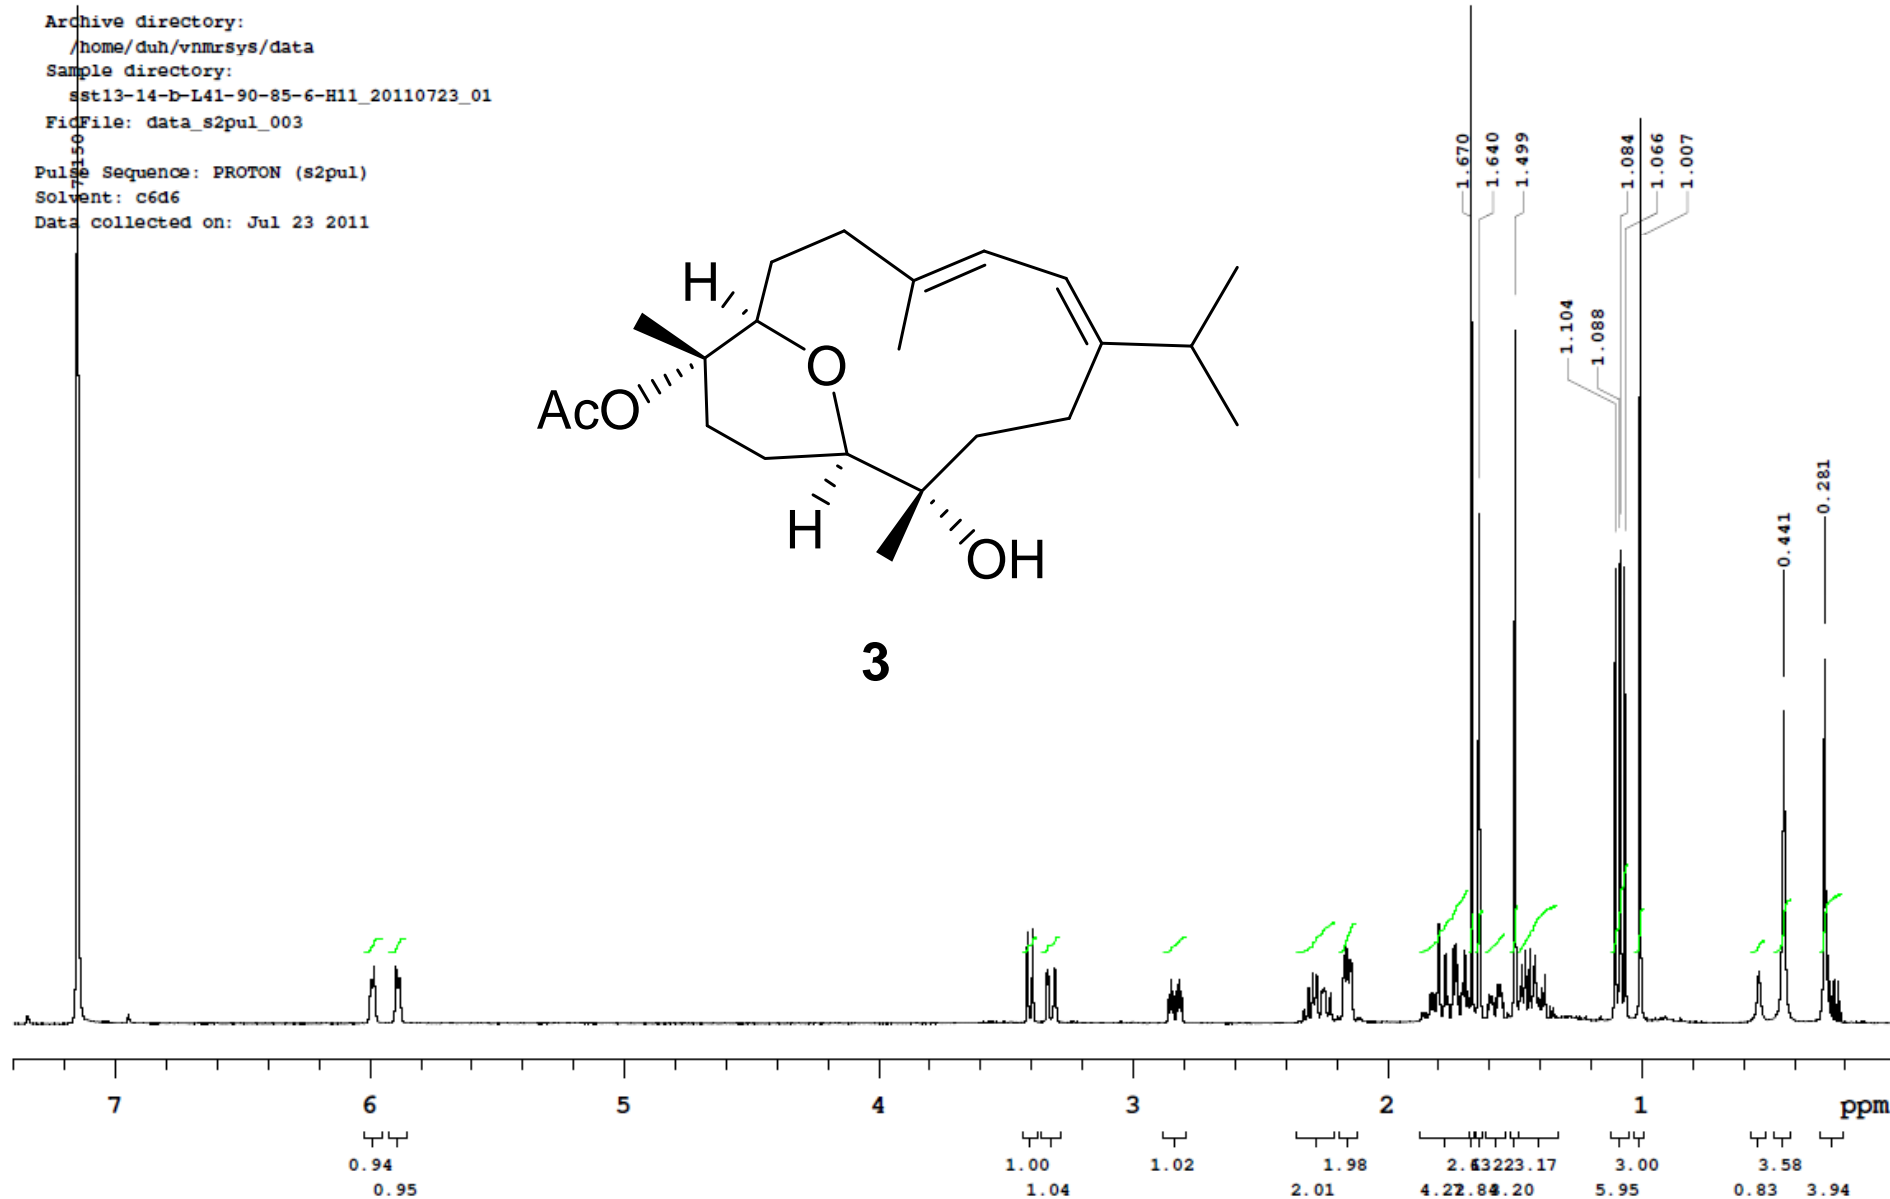

**Figure S6.**  $^{13}\text{C}$  NMR spectrum (100 MHz) ehrenbergol B (**3**) in  $\text{C}_6\text{D}_6$ .

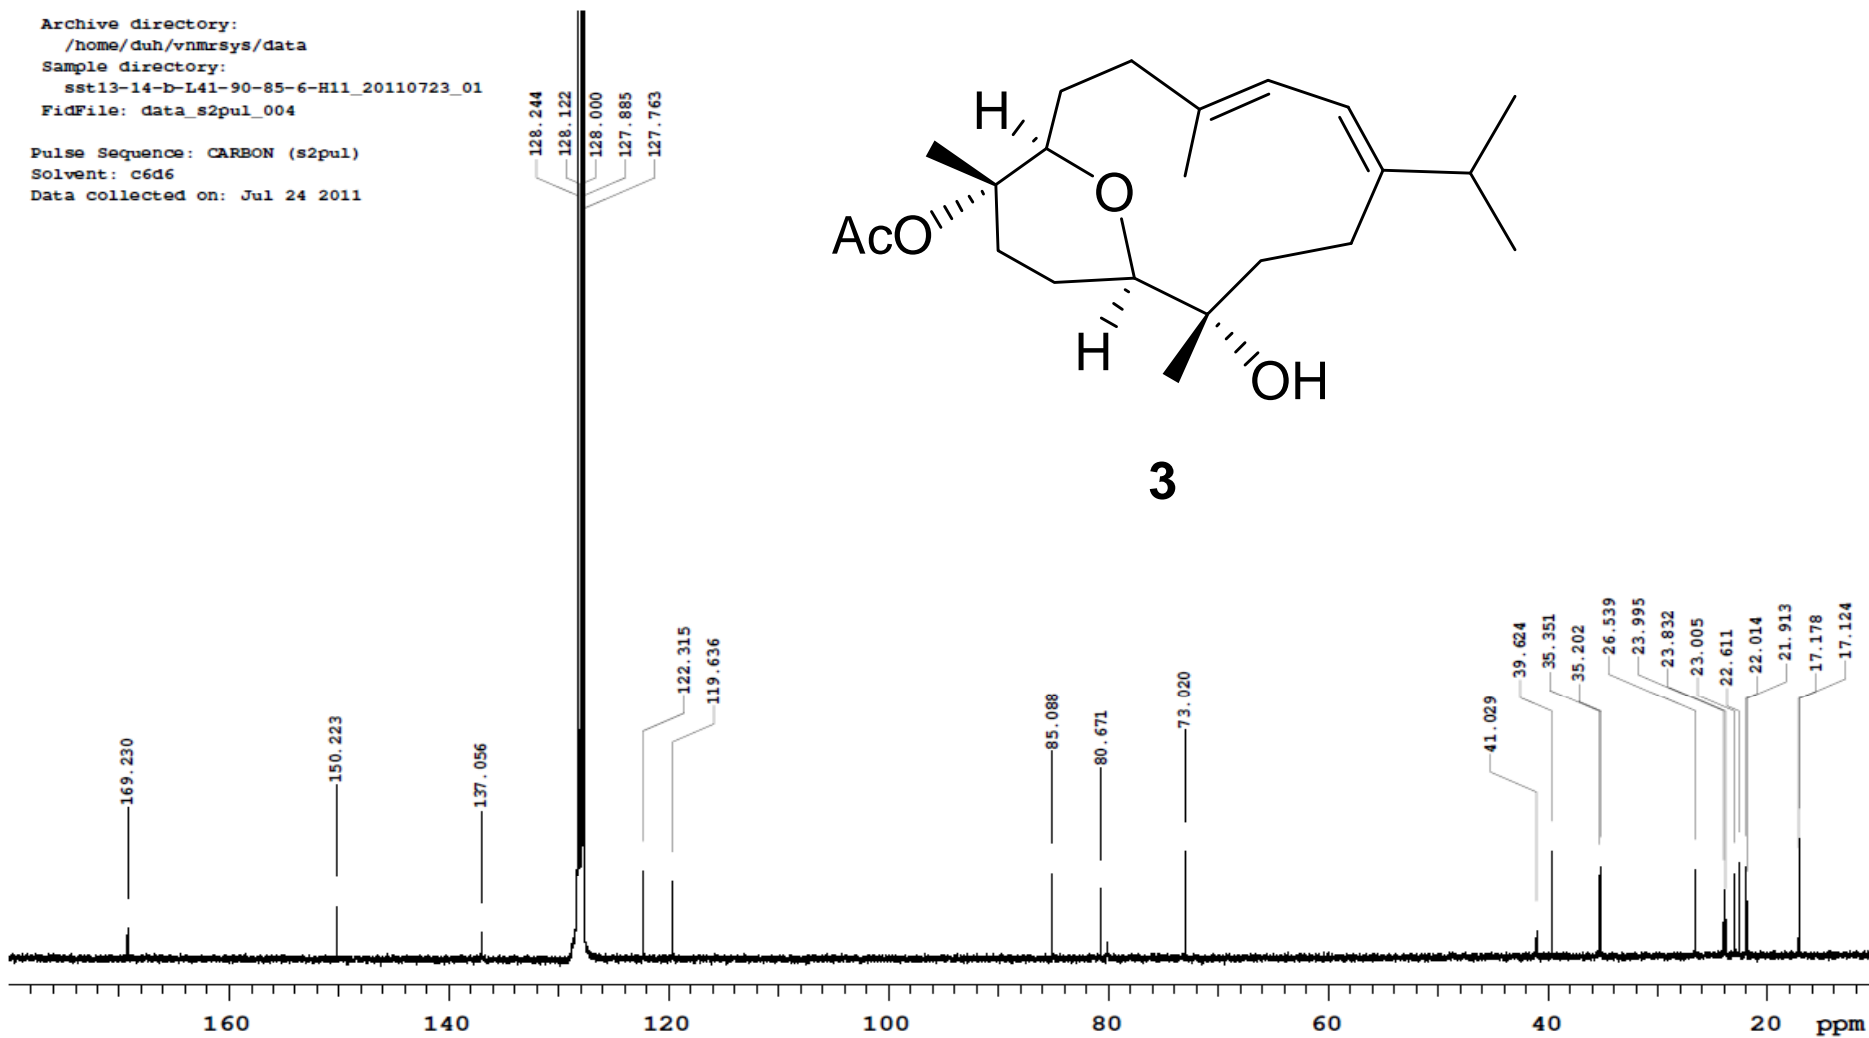

Supplement: marinedrugs-10-01433-s001.pdf [file marinedrugs-10-01433-s001.pdf]
